# Supplementary material for: Zinc and copper complexes with azacrown ethers and their comparative stability in vitro and in vivo
Source: Royal Society of Chemistry journal article supplement (doi:10.1039/d0dt00645a), 2020-01-01
Supplement: d0dt00645a1.pdf [file d0dt00645a1.pdf]

## Supporting materials

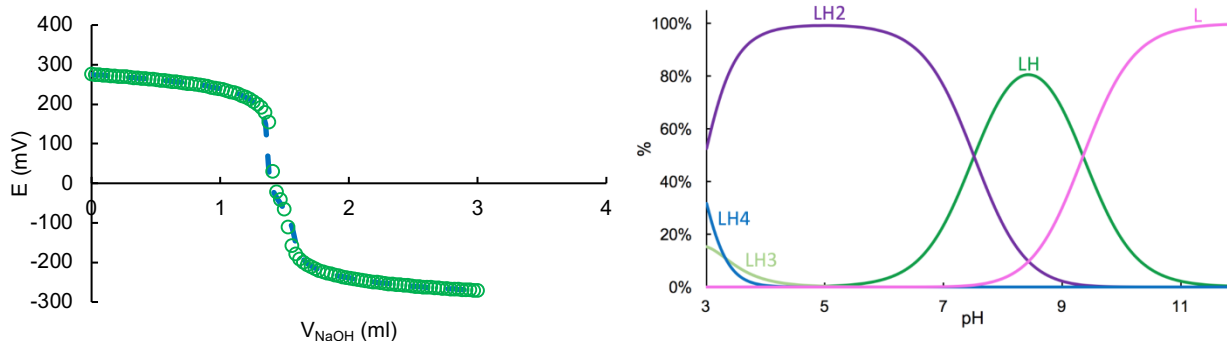

**Fig. S1.** L2 titration curve (left) and its protonated forms at various pH values (right).

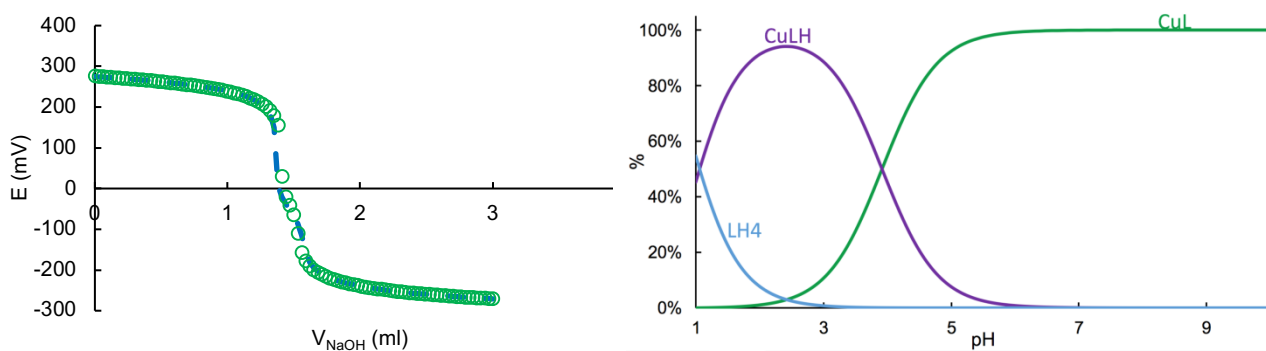

**Fig. S2.** CuL2 titration curve (left) and the complex forms at various pH values (right)

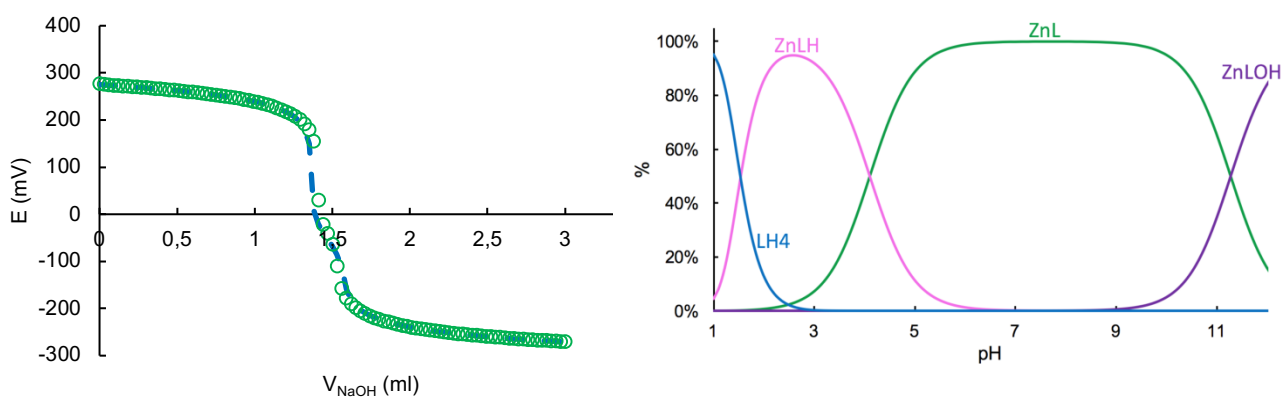

**Fig. S3.** ZnL2 titration curve (left) and the complex forms at various pH values (right)

**Table S1.** *In vivo* biodistribution of [<sup>65</sup>Zn]Zn blank, [<sup>65</sup>Zn]ZnL1, and [<sup>65</sup>Zn]ZnL2

|              | Zn blank   |            | ZnL1      |           | ZnL2      |           |
|--------------|------------|------------|-----------|-----------|-----------|-----------|
|              | 1 h        | 6 h        | 1 h       | 6 h       | 1 h       | 6 h       |
| Liver        | 7.45±1.31  | 11.12±0.8  | 3.22±0.16 | 3.31±1.01 | 2.72±0.32 | 0.98±0.38 |
| Kidneys      | 3.54±0.56  | 8.1±0.91   | 6.01±1.13 | 2.58±1.4  | 3.76±0.64 | 1.14±0.56 |
| Pancreas     | 11.71±1.24 | 13.56±3.54 | 4.32±0.98 | 3.04±1.9  | 1.06±0.71 | 0.57±0.29 |
| Spleen       | 7.66±1.59  | 5.35±0.5   | 2.32±0.19 | 1.69±0.94 | 0.41±0.16 | 0.36±0.11 |
| Lungs        | 0.68±0.17  | 3.75±2.11  | 1.42±0.02 | 0.97±0.65 | 0.46±0.05 | 0.18±0.06 |
| Heart        | 0.38±0.08  | 2.7±1.03   | 0.78±0.04 | 0.38±0.33 | 0.26±0.04 | 0.12±0.06 |
| Brain        | 0.13±0.03  | 0.62±0.24  | 0.22±0.02 | 0.07±0.13 | 0.09±0.03 | 0.04±0.03 |
| Femur        | 1.26±0.88  | 5.59±0.52  | 1.18±0.36 | 1.2±1.04  | 0.7±0.02  | 0.47±0.4  |
| Blood        | 0.28±0.02  | 0.33       | 0.54±0.09 | 0.05±0.09 | 0.42±0.27 | 0.03±0.01 |
| Urea         | 27.96      | 20.13      | 439±339   | 71        | 286±153   | 152±23    |
| Rest of body | 1.78±0.22  | 2.47±1.1   | 1.09±0.09 | 1±0.13    | 0.94±0.13 | 0.4±0.17  |

**Table S2.** <sup>1</sup>H NMR (400 MHz, 298 K) chemical shifts (ppm) of **L1** recorded in D<sub>2</sub>O solution at different pD values in the absence and presence of Zn<sup>2+</sup> (1.5 equiv.). See Figure 2 for proton labeling and pD values.

|                  | <b>L1</b> <sup>3-</sup> | <b>H</b> <sup>+</sup> | <b>Zn</b> <sup>2+</sup>                 |
|------------------|-------------------------|-----------------------|-----------------------------------------|
| H <sub>1</sub>   | 8.13                    | 8.08 (Δδ = -0.05)     | 8.01 (Δδ = -0.12)                       |
| H <sub>2</sub>   | 8.15                    | 8.08 (Δδ = -0.07)     | 8.04 (Δδ = -0.11);<br>8.07 (Δδ = -0.08) |
| H <sub>5a</sub>  | 3.46                    | 3.84 (Δδ = 0.38)      | 3.70 (Δδ = 0.24)                        |
| H <sub>5e</sub>  |                         |                       | 3.35 (Δδ = -0.11)                       |
| H <sub>6a</sub>  | 2.75                    | 2.98 (Δδ = 0.23)      | 2.90 (Δδ = 0.15)                        |
| H <sub>6e</sub>  |                         |                       | 2.67 (Δδ = -0.08)                       |
| H <sub>7a</sub>  | 2.66                    | 3.28 (Δδ = 0.62)      | 2.87 (Δδ = 0.21)                        |
| H <sub>7e</sub>  |                         |                       | 2.74 (Δδ = 0.08)                        |
| H <sub>8a</sub>  | 2.66                    | 3.50 (Δδ = 0.84)      | 3.07 (Δδ = 0.41)                        |
| H <sub>8e</sub>  |                         |                       | 2.97 (Δδ = 0.31)                        |
| H <sub>9x</sub>  | 3.12                    | 3.84 (Δδ = 0.72)      | 3.57 (Δδ = 0.45)                        |
| H <sub>9y</sub>  |                         |                       | 3.10 (Δδ = -0.02)                       |
| H <sub>11x</sub> | 2.99                    | 3.27 (Δδ = 0.28)      | 3.42 (Δδ = 0.43)                        |
| H <sub>11y</sub> |                         |                       | 3.18 (Δδ = 0.19)                        |

**Table S3.**  $^1\text{H}$  NMR (400 MHz, 298 K) chemical shifts ( $\delta$ , ppm) of **L2** recorded in  $\text{D}_2\text{O}$  solution at different pD values in the absence and presence of  $\text{Zn}^{2+}$  (1.5 equiv.). See Figure 3 for proton labeling and pD values.

|                  | <b>L2<sup>3-</sup></b> | <b>H<sup>+</sup></b>           | <b>Zn<sup>2+</sup></b>          |
|------------------|------------------------|--------------------------------|---------------------------------|
| H <sub>1</sub>   | 6.94                   | 7.00 ( $\Delta\delta = 0.06$ ) | 6.97 ( $\Delta\delta = 0.03$ )  |
| H <sub>2</sub>   | 6.94                   | 7.00 ( $\Delta\delta = 0.06$ ) | 6.97 ( $\Delta\delta = 0.03$ )  |
| H <sub>4a</sub>  | 4.02                   | 4.36 ( $\Delta\delta = 0.34$ ) | 4.23 ( $\Delta\delta = 0.21$ )  |
| H <sub>4e</sub>  |                        |                                | 3.96 ( $\Delta\delta = -0.06$ ) |
| H <sub>5a</sub>  | 3.02                   | 3.79 ( $\Delta\delta = 0.77$ ) | 3.41 ( $\Delta\delta = 0.39$ )  |
| H <sub>5e</sub>  |                        |                                | 3.22 ( $\Delta\delta = 0.20$ )  |
| H <sub>6a</sub>  | 2.69                   | 3.51 ( $\Delta\delta = 0.82$ ) | 2.90 ( $\Delta\delta = 0.21$ )  |
| H <sub>6e</sub>  |                        |                                | 2.63 ( $\Delta\delta = -0.06$ ) |
| H <sub>7a</sub>  | 2.61                   | 3.17 ( $\Delta\delta = 0.56$ ) | 3.22 ( $\Delta\delta = 0.61$ )  |
| H <sub>7e</sub>  |                        |                                | 2.90 ( $\Delta\delta = 0.29$ )  |
| H <sub>8x</sub>  | 3.15                   | 3.85 ( $\Delta\delta = 0.70$ ) | 3.35 ( $\Delta\delta = 0.20$ )  |
| H <sub>8y</sub>  |                        |                                | 3.16 ( $\Delta\delta = 0.01$ )  |
| H <sub>10x</sub> | 3.04                   | 3.15 ( $\Delta\delta = 0.11$ ) | 3.34 ( $\Delta\delta = 0.30$ )  |
| H <sub>10y</sub> |                        |                                | 3.17 ( $\Delta\delta = 0.13$ )  |
